# Supplementary material for: Evolution of pigment synthesis pathways by gene and genome duplication in fish
Source: Springer Nature journal article supplement (doi:10.1186/1471-2148-7-74), 2007-01-01

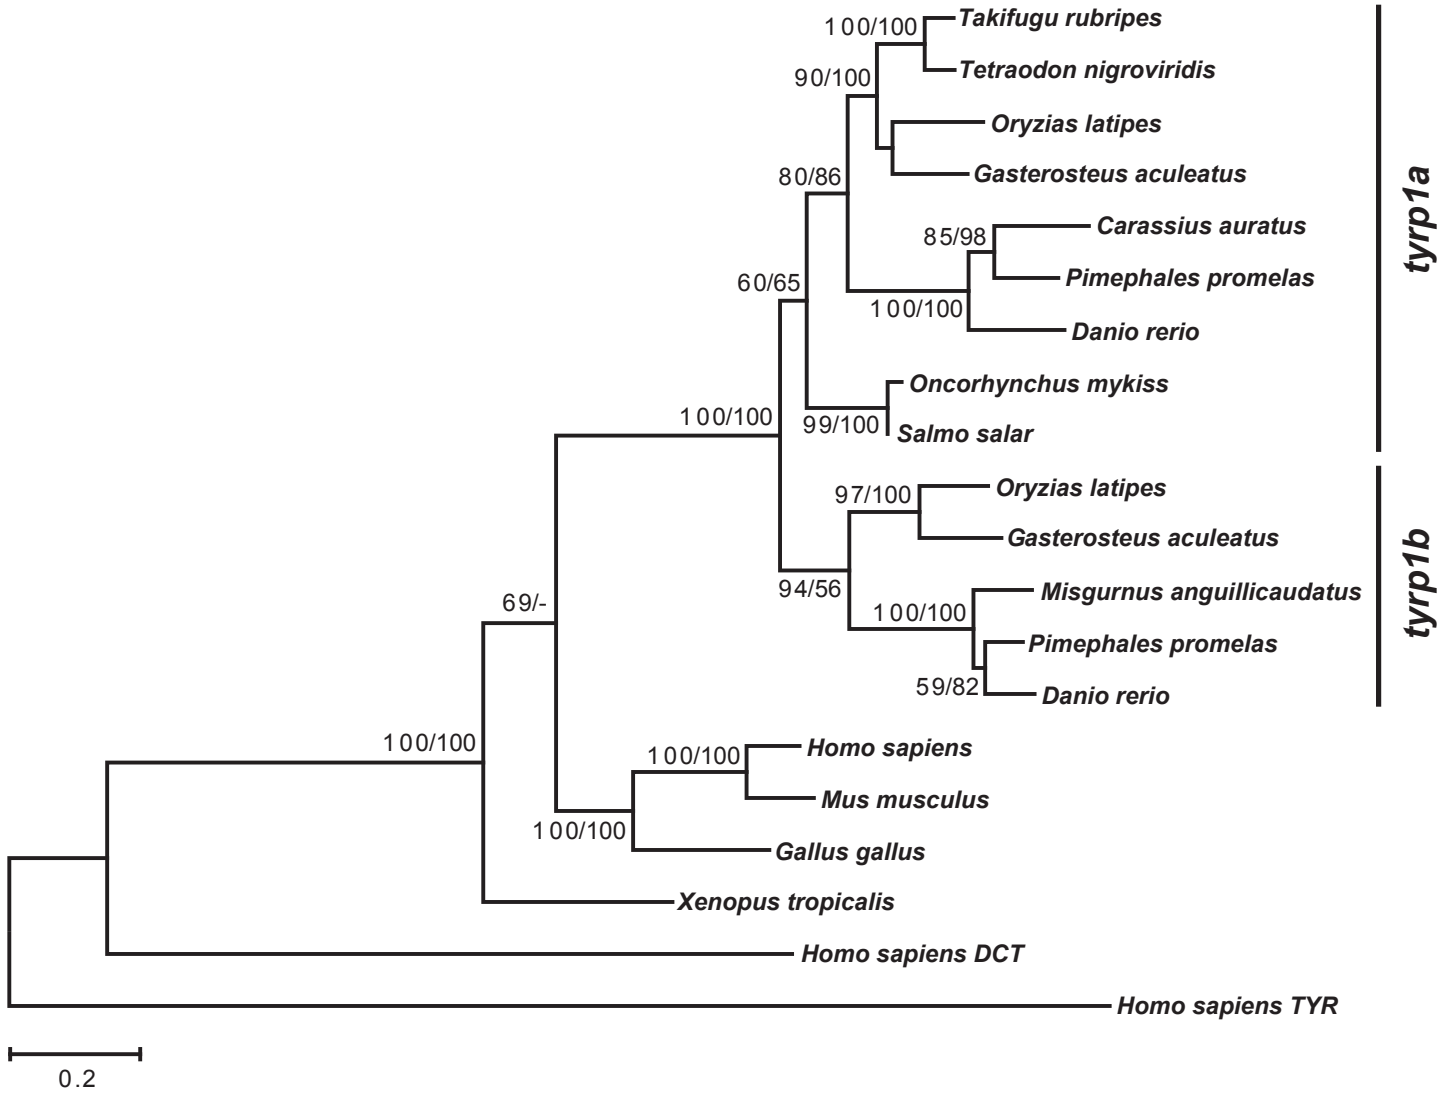

Supplement: Additional file 3 [file 1471-2148-7-74-s3.pdf]
